# Supplementary material
Source: Elsevier journal article supplement (https://www.sciencedirect.com/science/article/pii/S0009739X19303288)
Supplement: mmc1 [file S0009739X19303288:mmc1.docx]

**HOJA DE RECOGIDA DE DATOS**

**Datos epidemiológicos del participante**

Nombre…………..

Edad…………...

Residente/staff…………………...año residencia…………...

Mano dominante dch/izq

**Experiencia profesional**: Procedimientos LPS avanzadas nº………..

Anastomosis LPT realizadas. Nº……….

Anastomosis LPS realizadas Nº……….

Anastomosis intestinales en entrenamiento. Nº………..

NOMBRE INSTRUCTOR…………………………………………………………...

**Calidad de la anastomosis**

1.- Distancia entre puntos (en mm.)

I.…..I…...I…...I…...I.…..I…...I..….I…...I.…..I…...I.…..I…...I…...I.…..I…...I

Discrepancia I.…..I…...I…...I…...I.…..I…...I..….I…...I.…..I…...I.…..I…...I…...I.…..I

2.- Eversión de bordes si/no mm total de eversión………

I.…..I…...I…...I…...I.…..I…...I..….I…...I.…..I…...I.…..I…...I…...I.…..I…...I

3.- Longitud de la anastomosis…………….mm

Tensión de la sutura hilo sobrante…………….mm

4.- Fuga la anastomosis si / no

- Fuga sin presión: si / no
- Fuga con presión: si / no

5.- Perforación intestinal si / no

Deserosamiento intestinal mínimo / amplio

**TIEMPO DE EJECUCIÓN DE LA ANASTOMOSIS** (desde el inicio del primer punto sero-seroso posterior hasta el anudado de los cabos de la sutura continua de cara anterior)................................. minutos.
